# Supplementary material
Source: PubMed Central journal article supplement (PMC4508200)

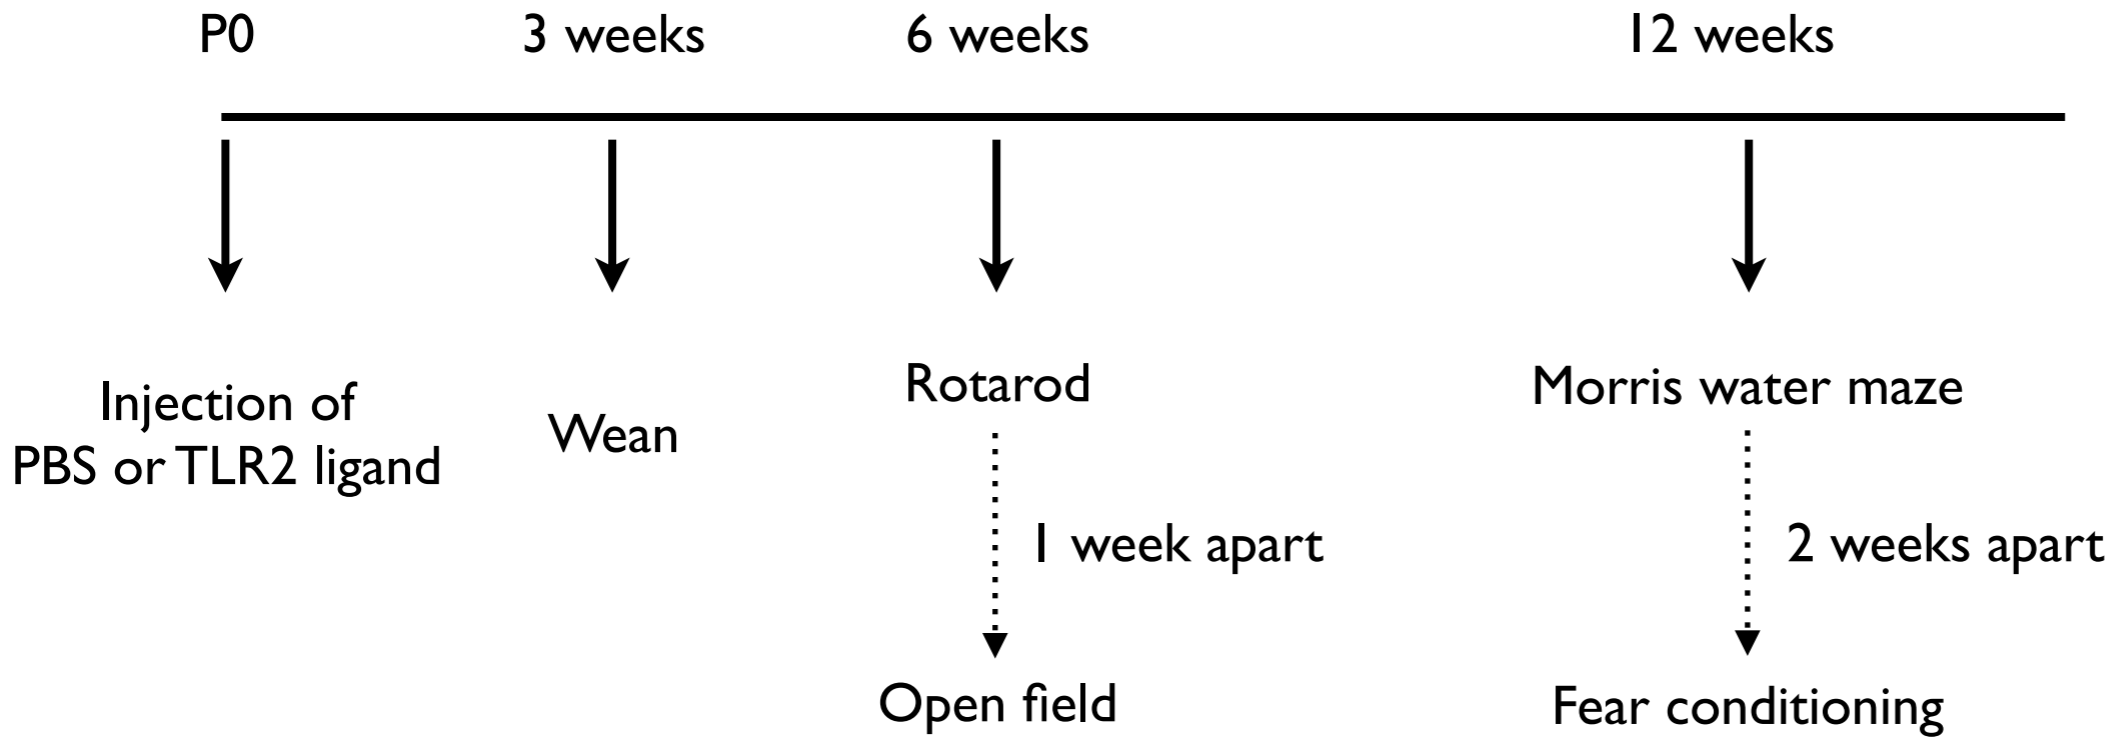

Figure 1

A

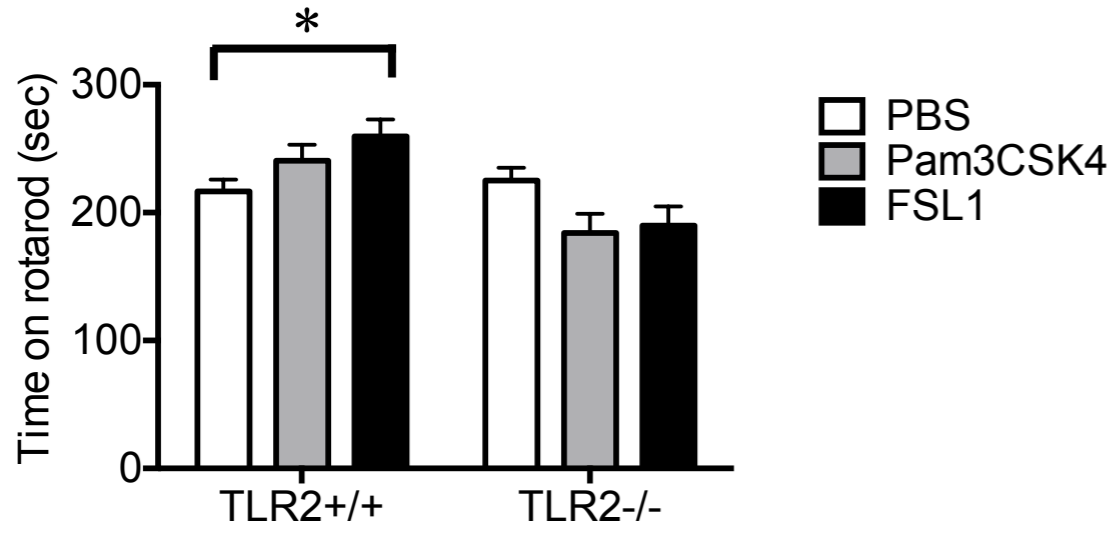

B

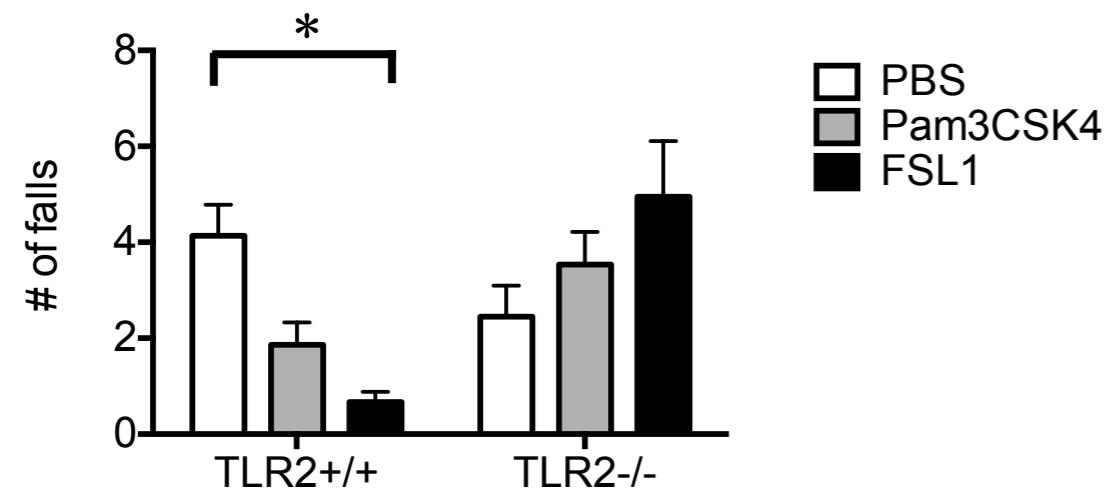

Figure 2

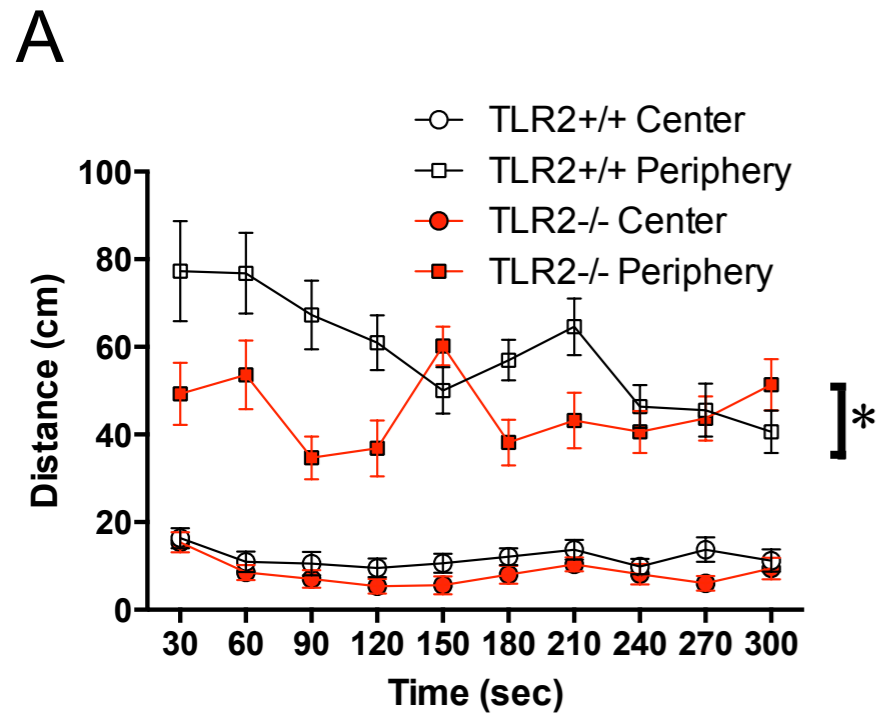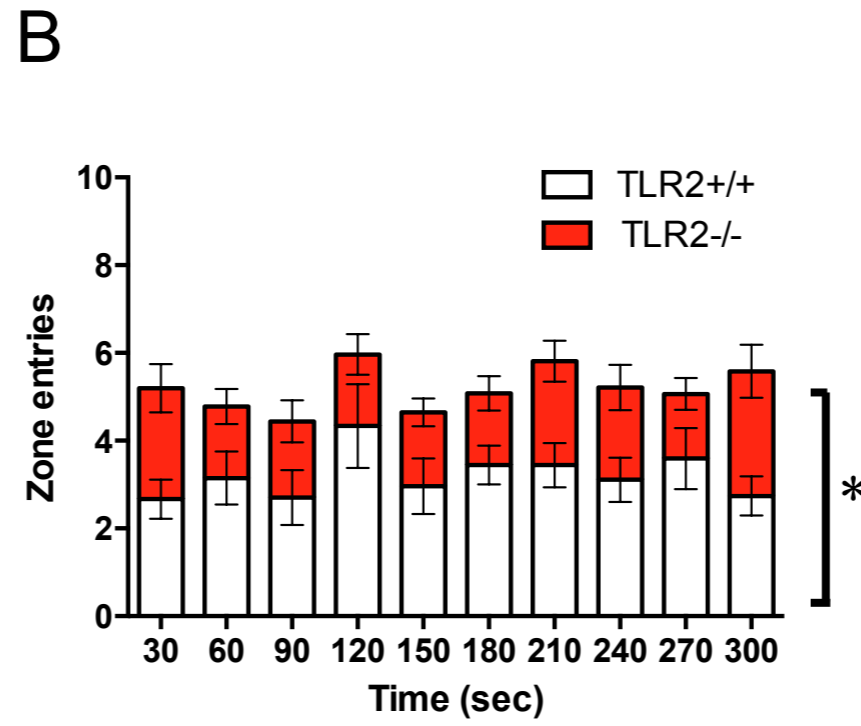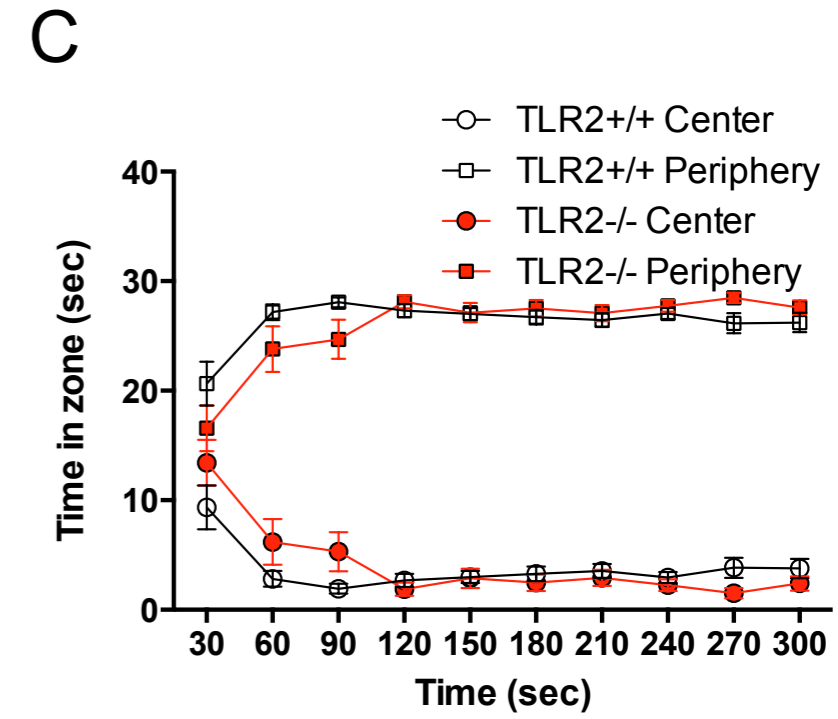

Figure 3

A

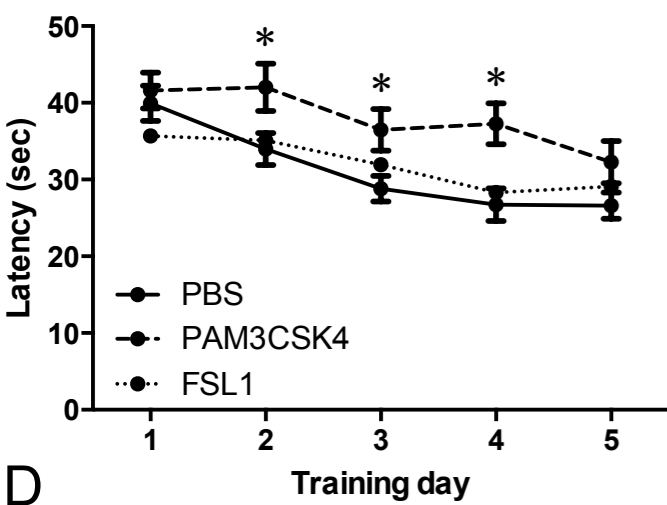

B

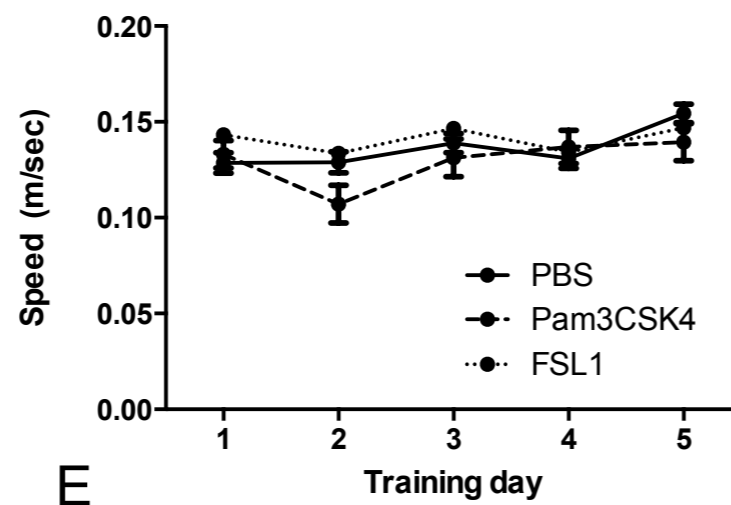

C

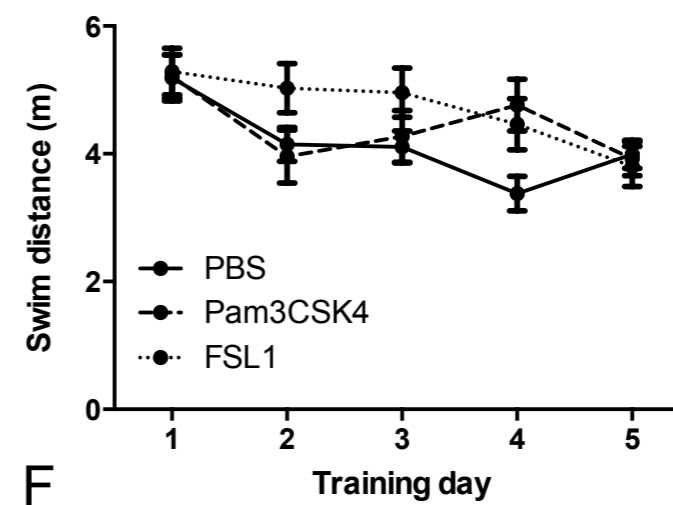

D

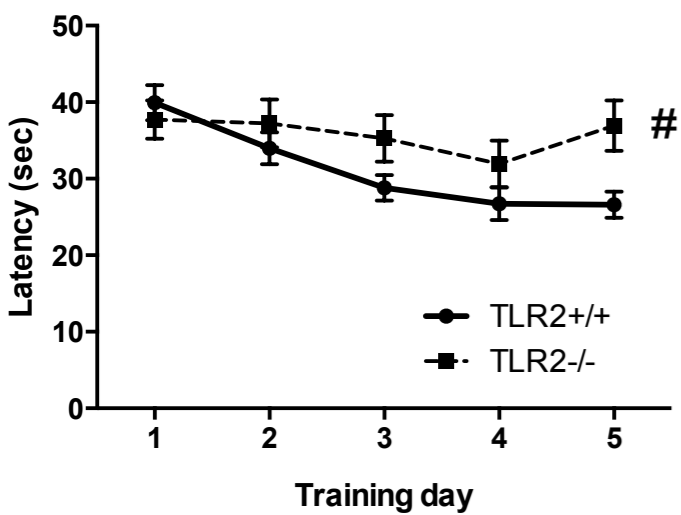

E

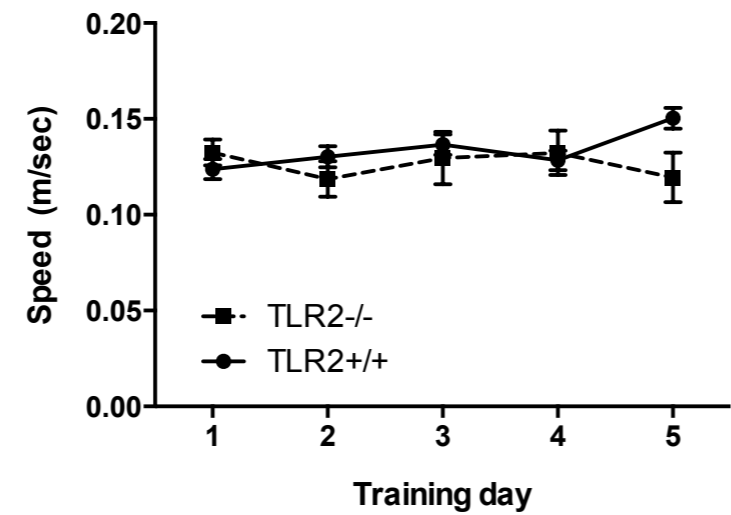

F

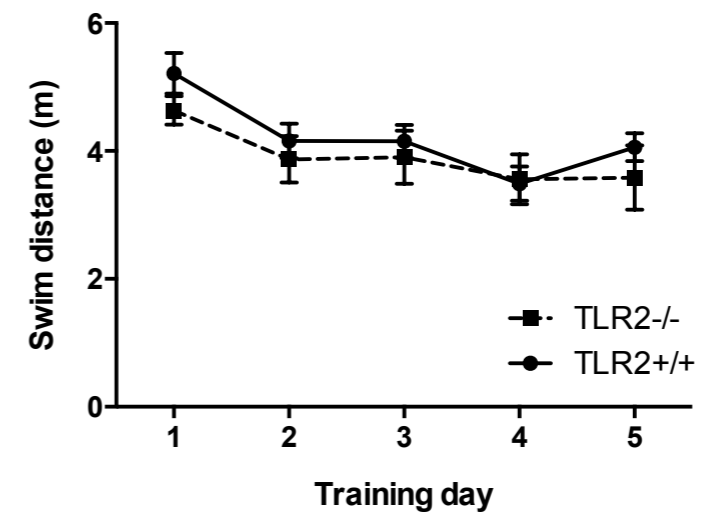

Figure 4

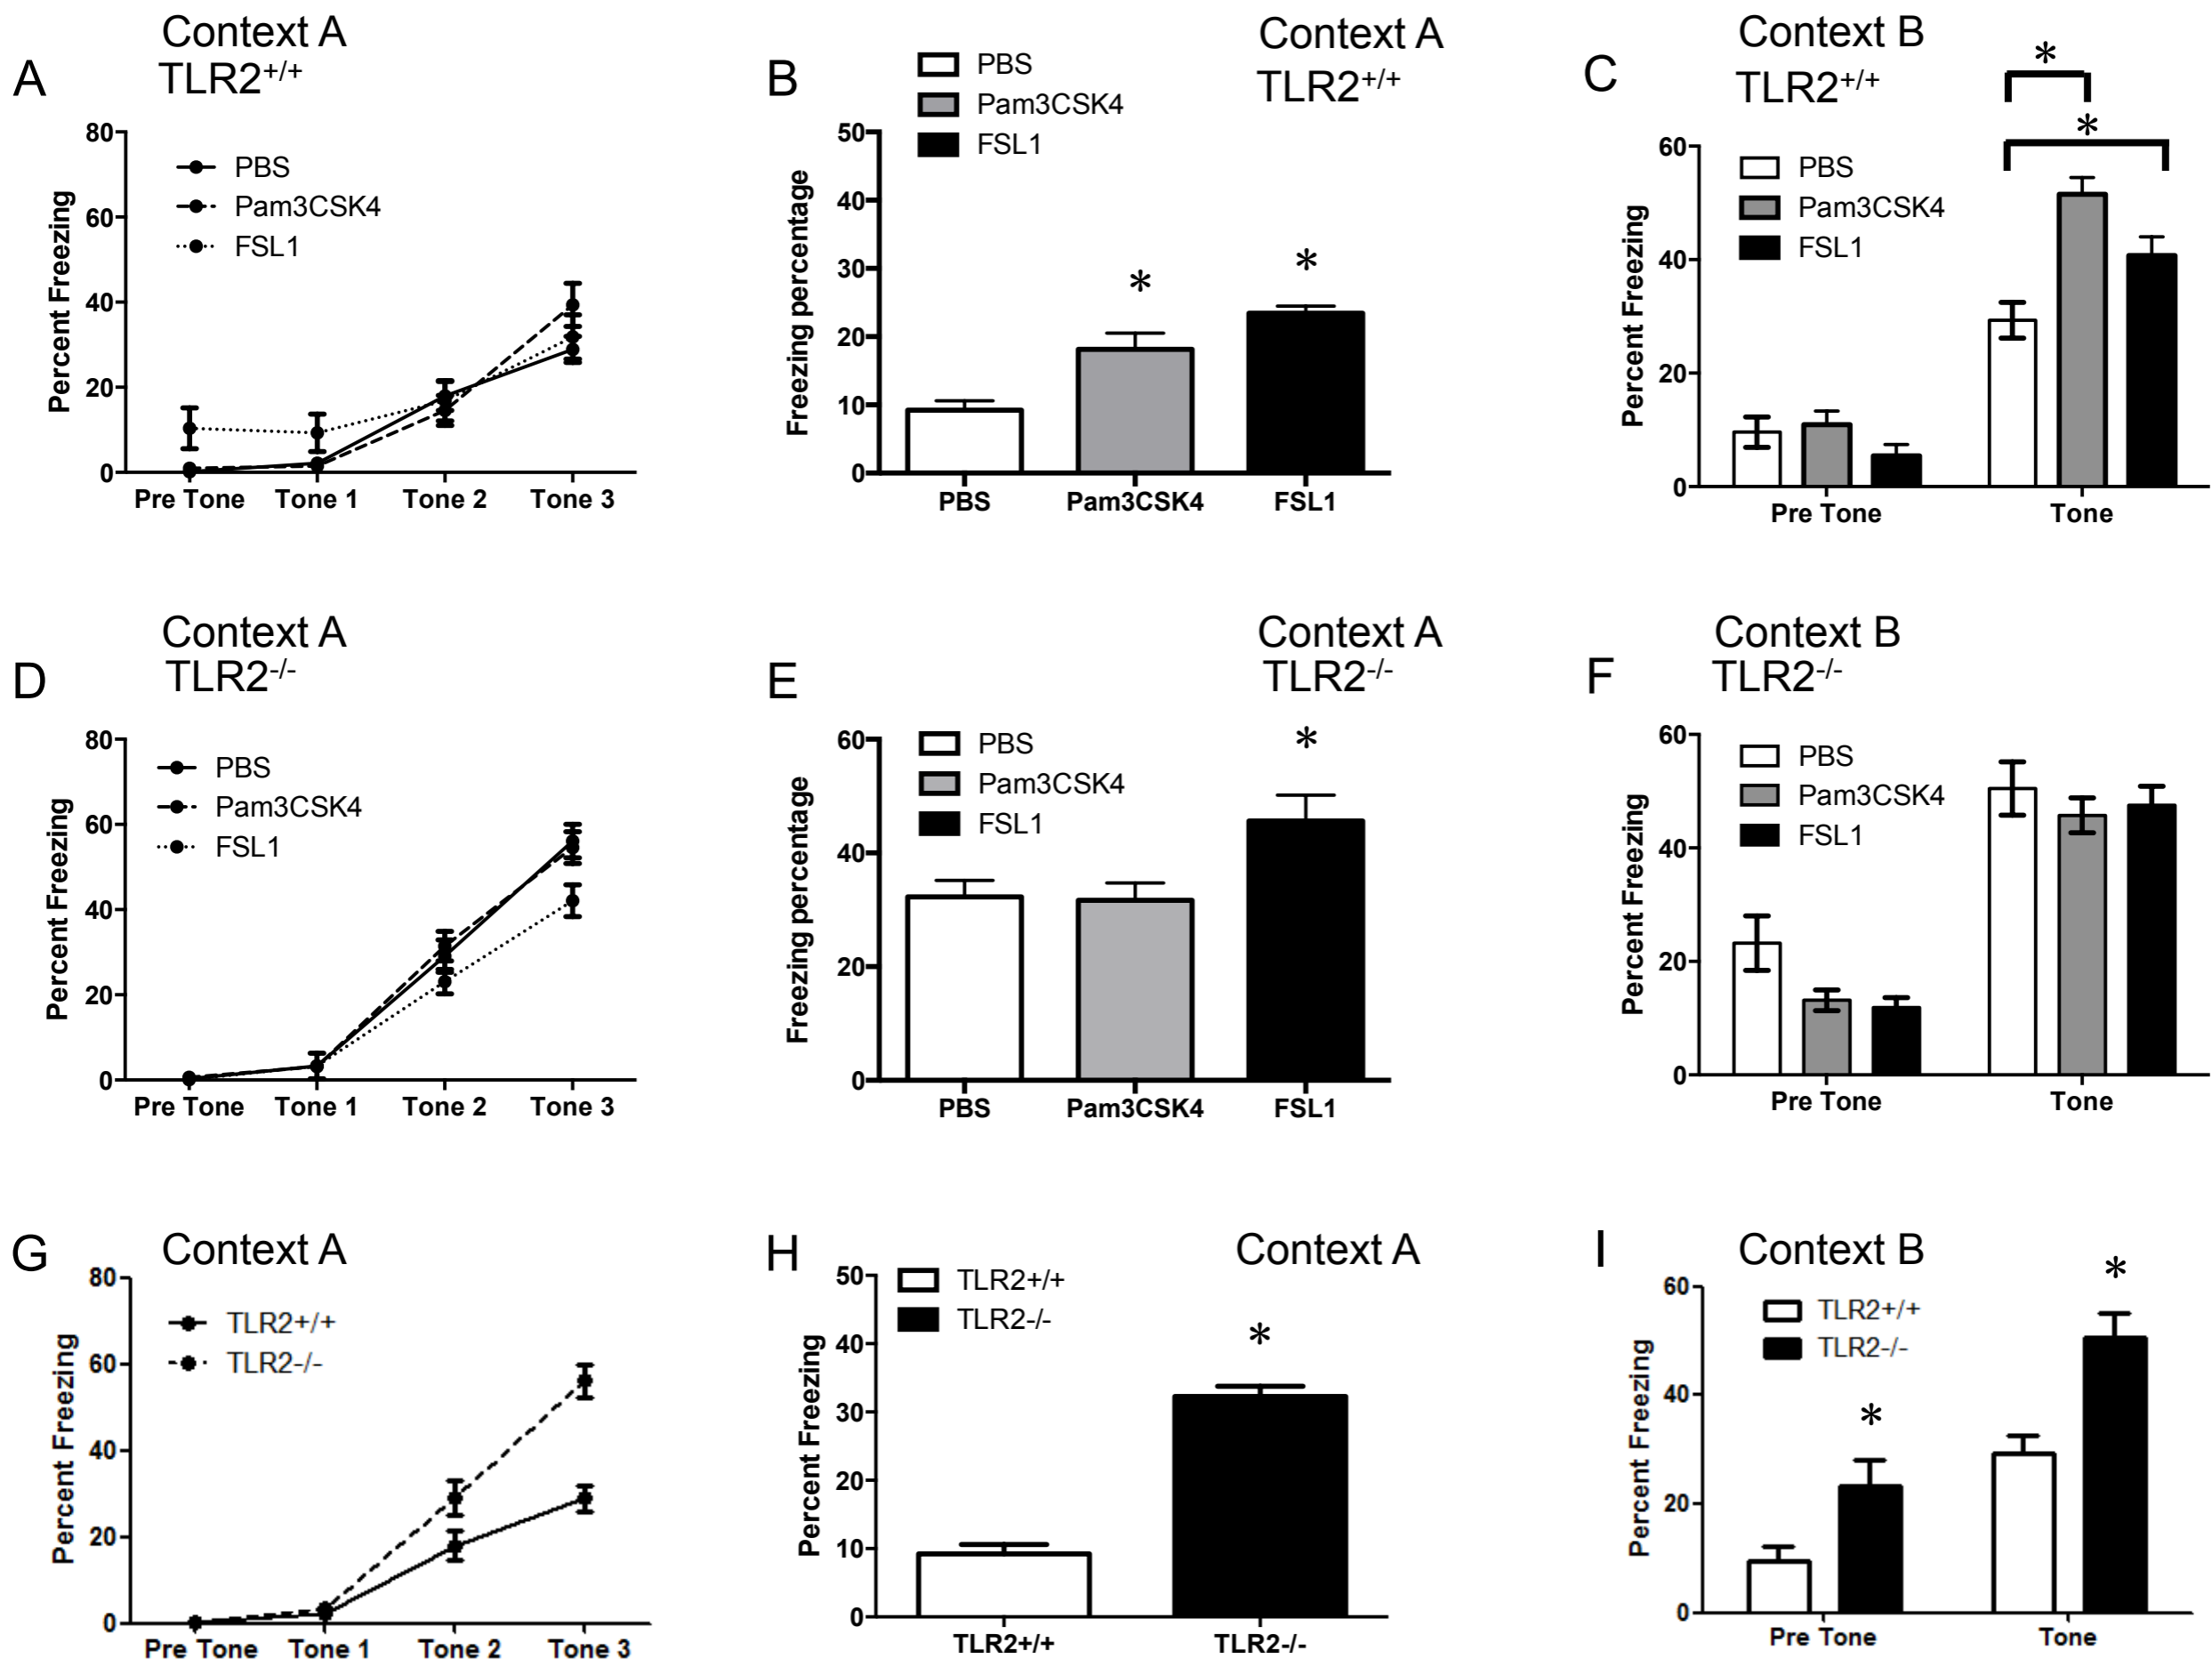

Figure 5

A

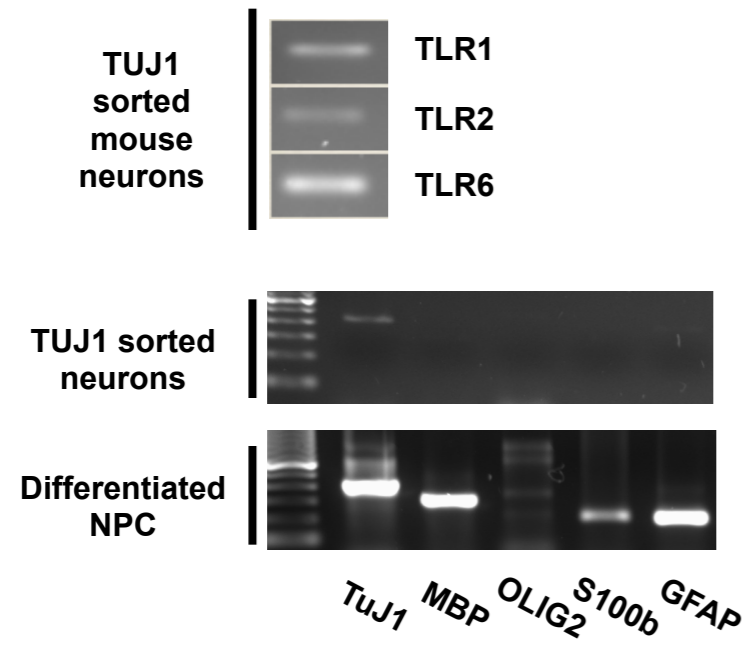

B

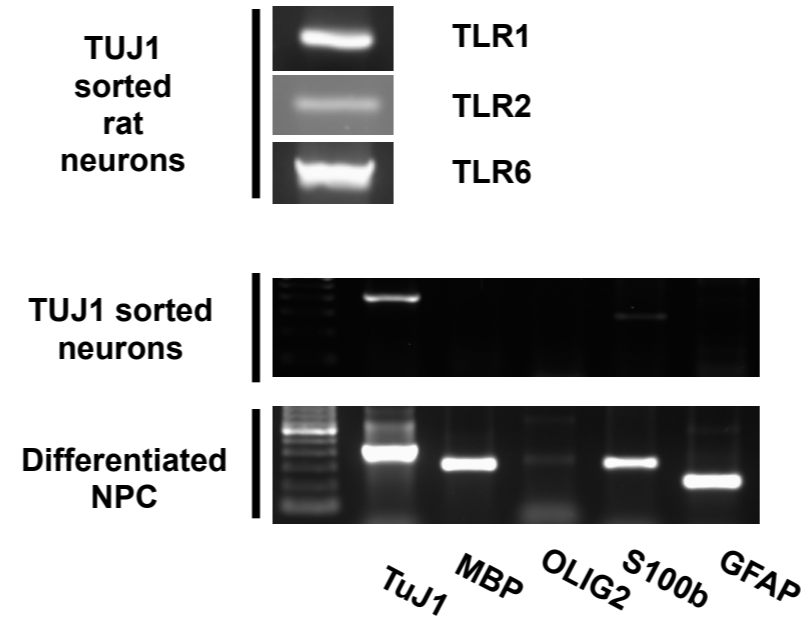

Figure 6

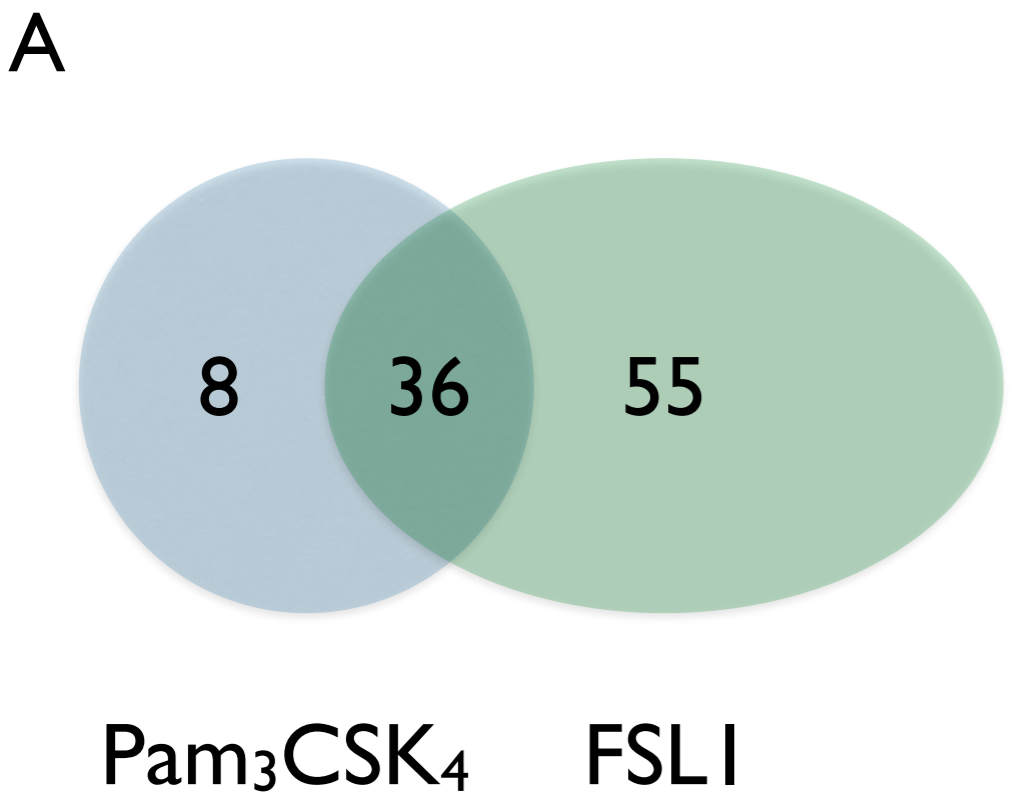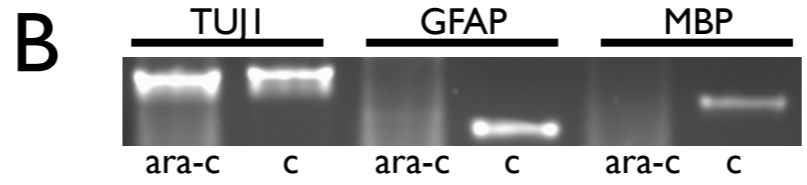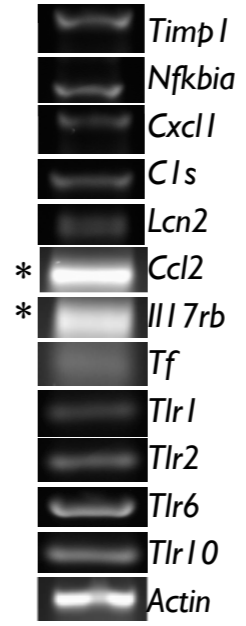

ara-c  
treated  
neurons

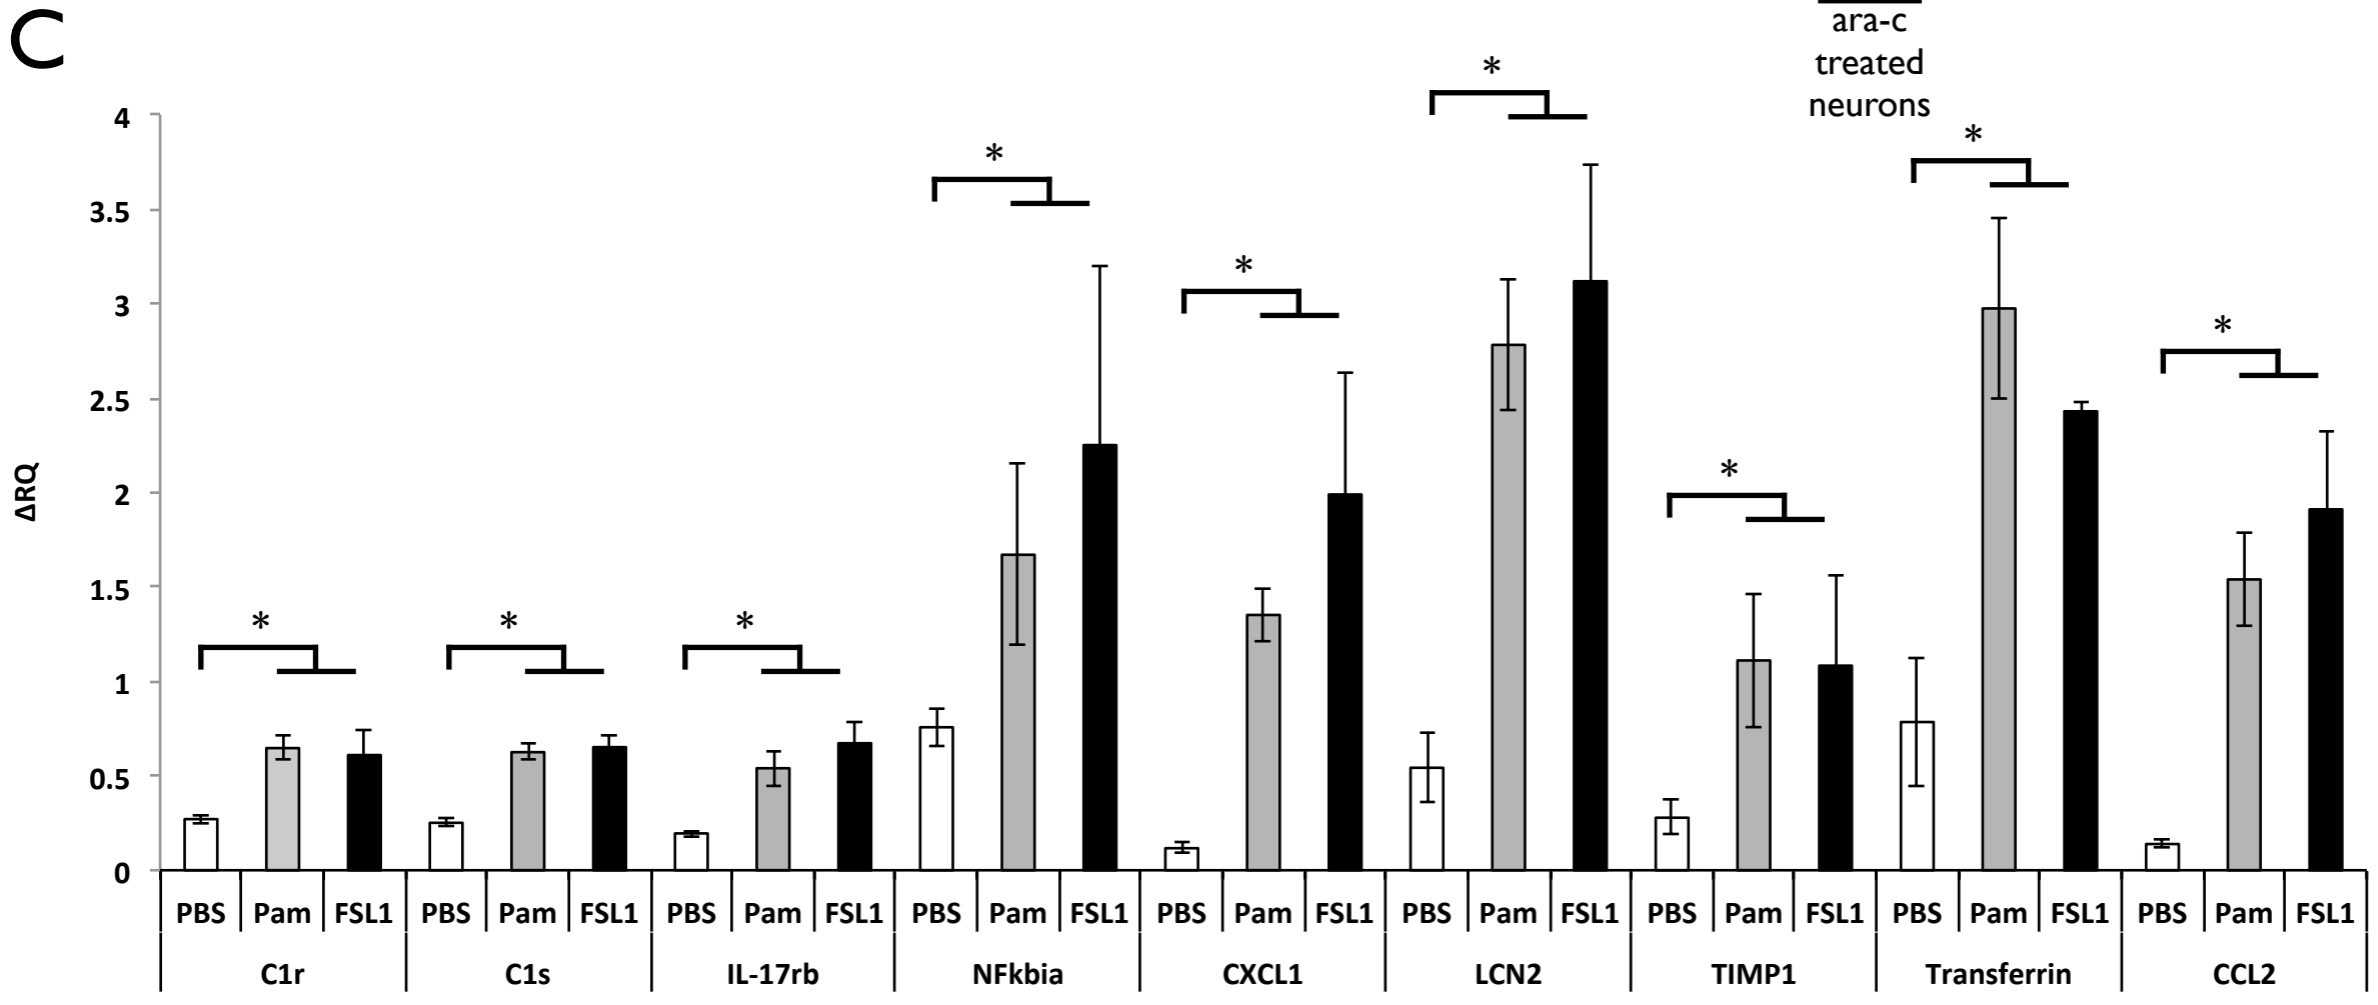

Figure 7

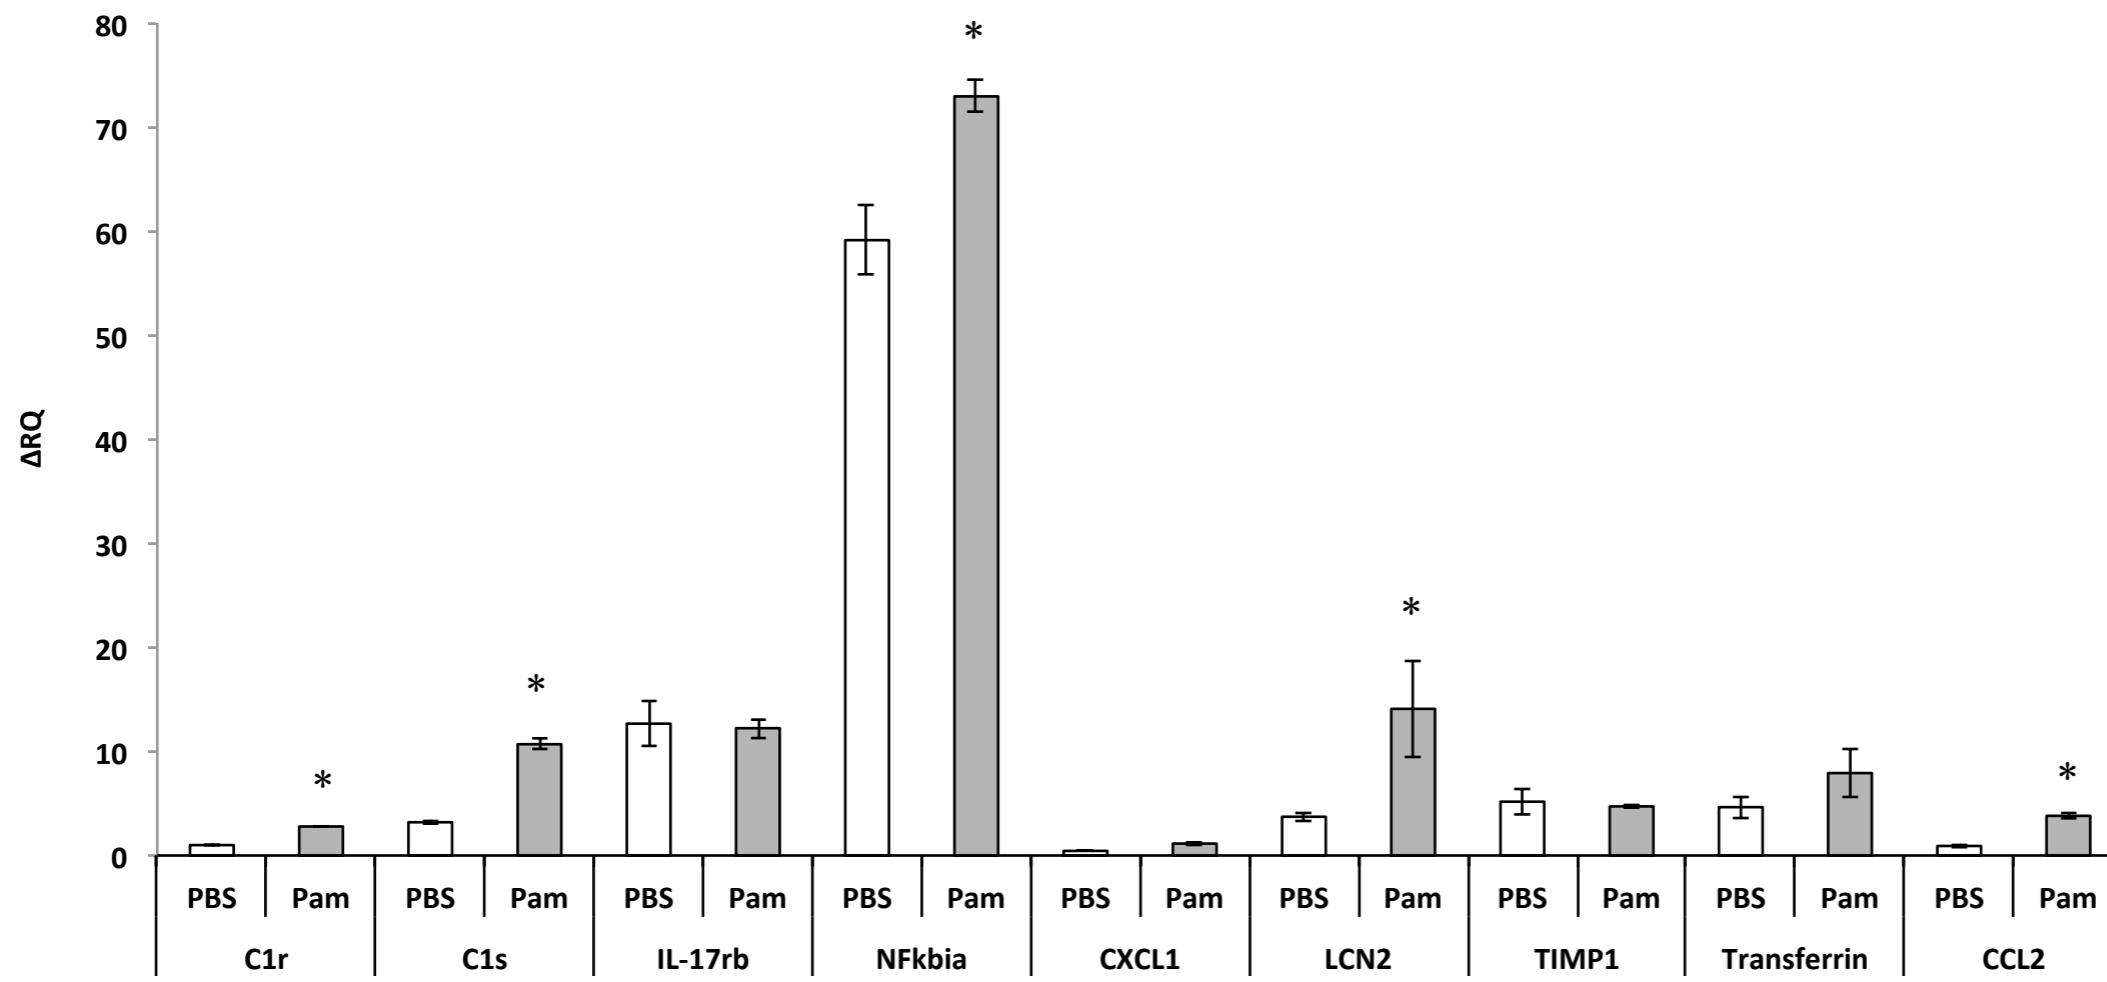

Figure 8

Supplement: NIHMS694322-supplement-1.pdf [file NIHMS694322-supplement-1.pdf]

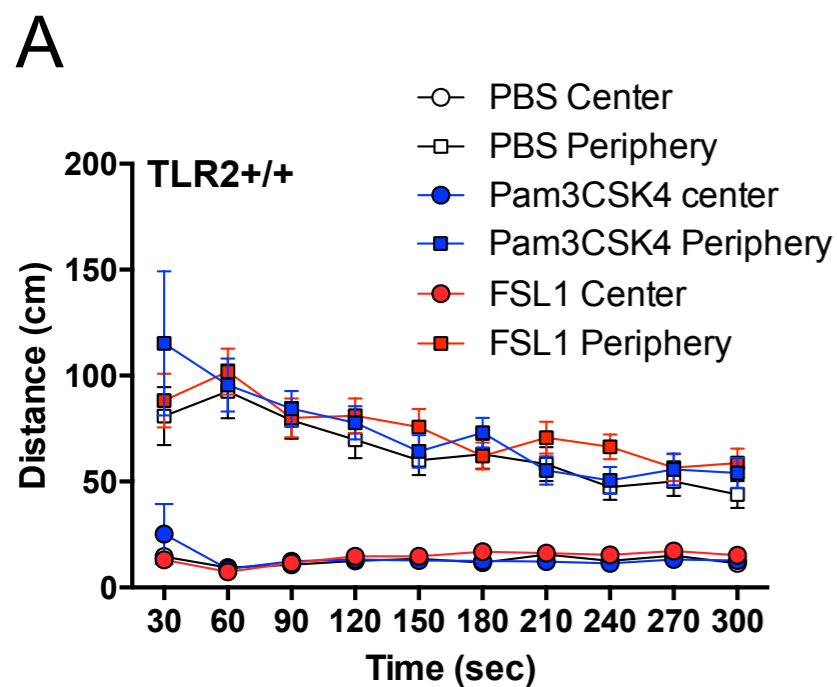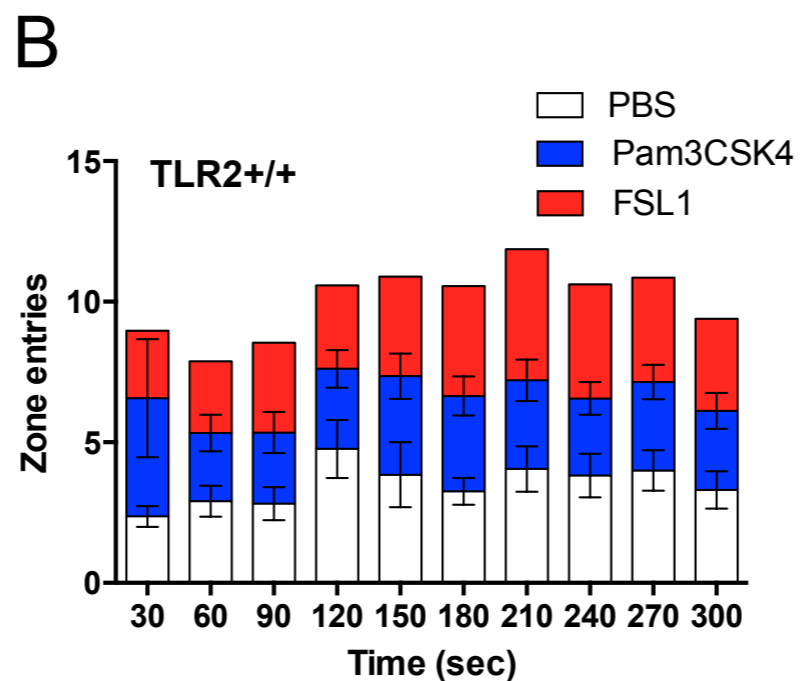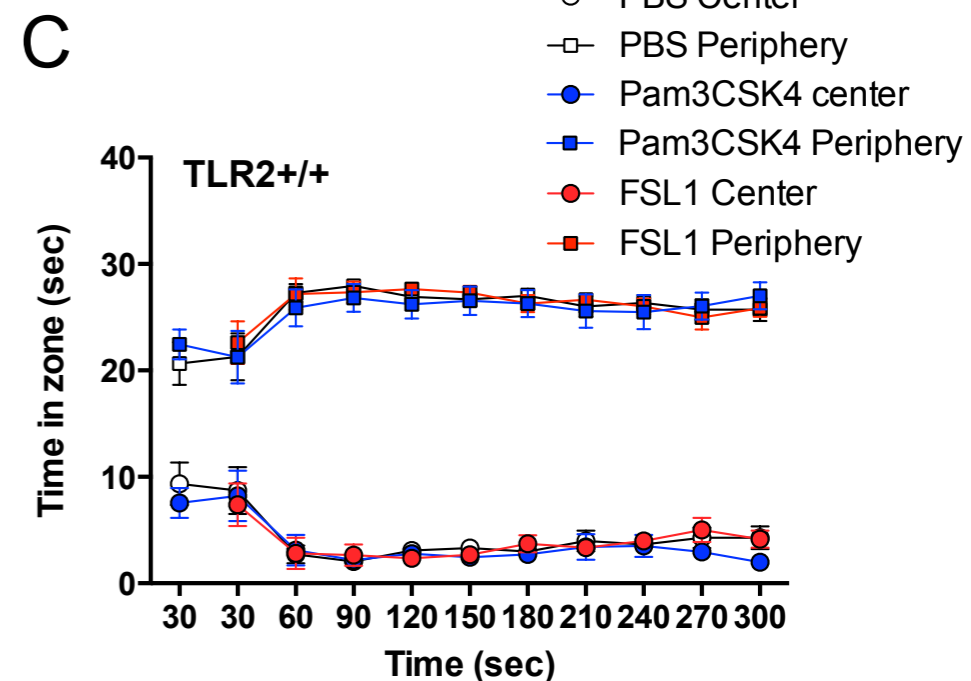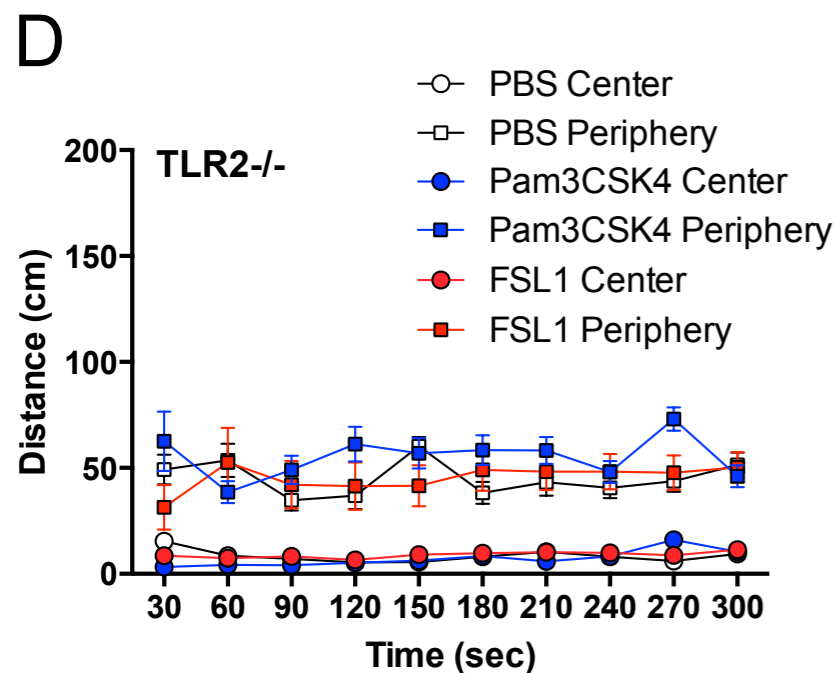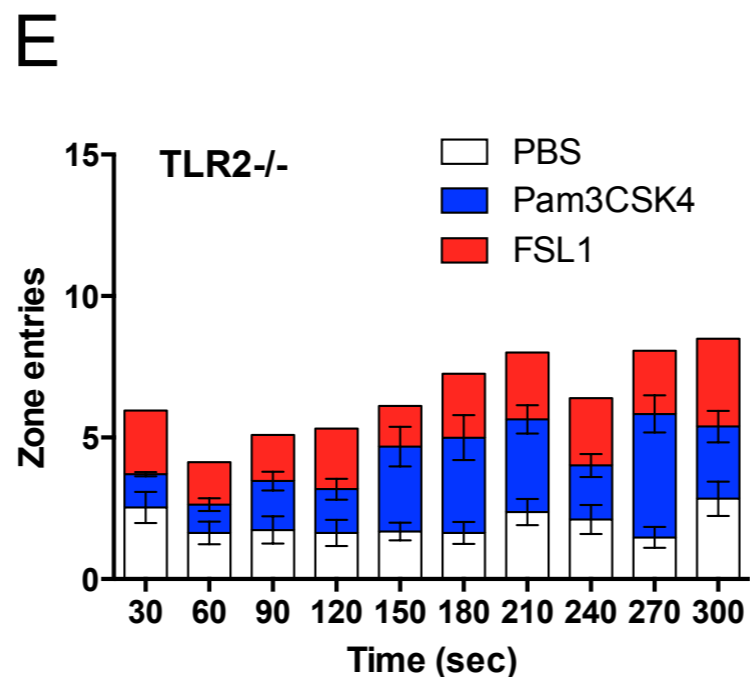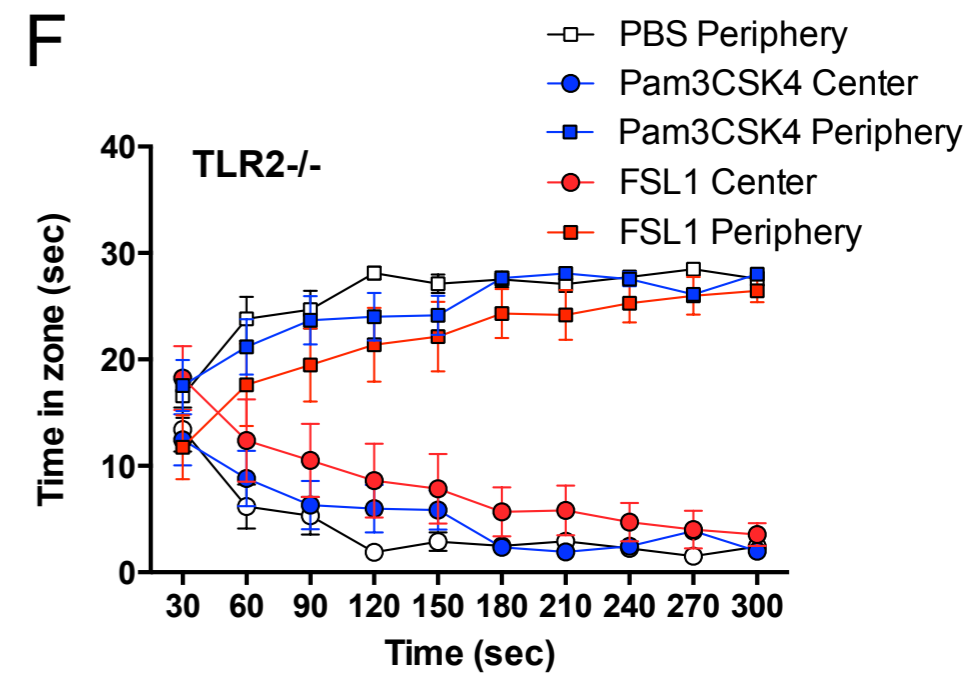

**A**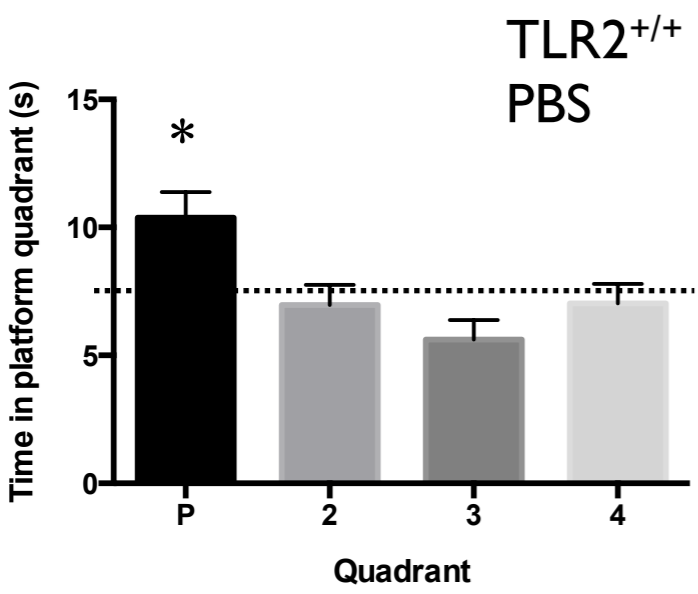**D**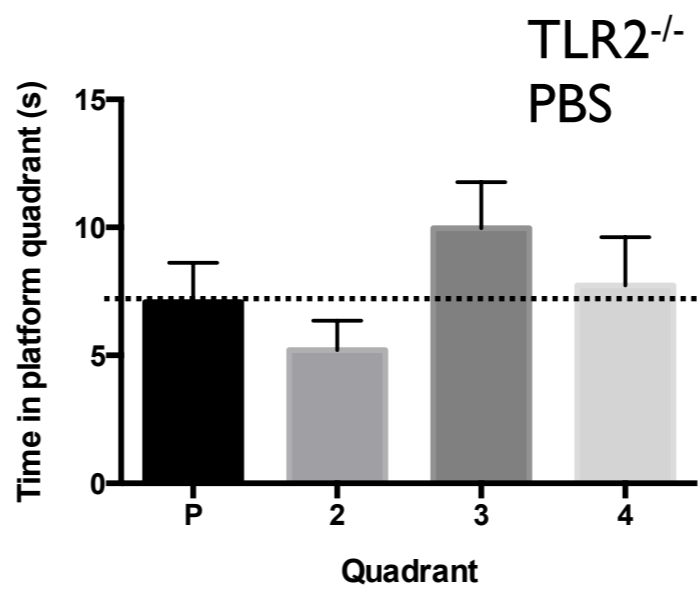**B**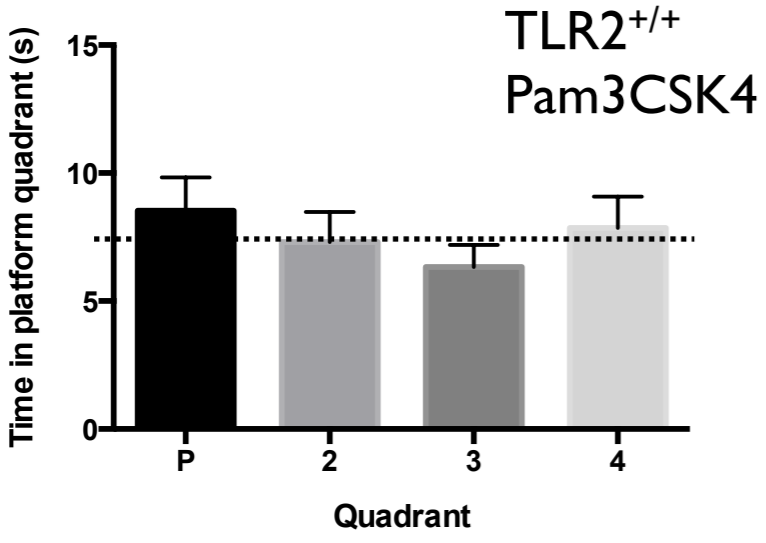**E**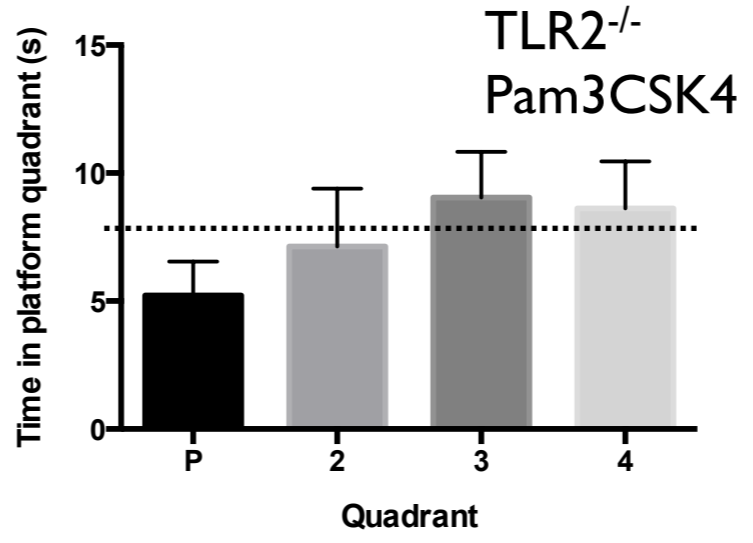**C**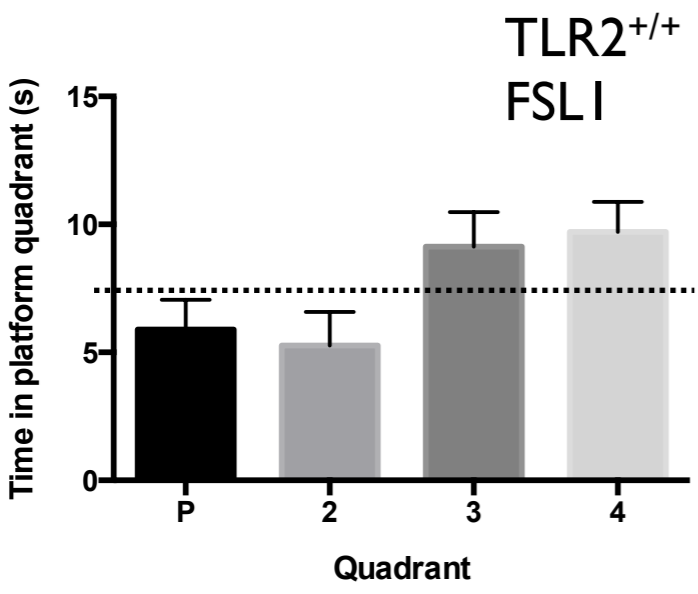**F**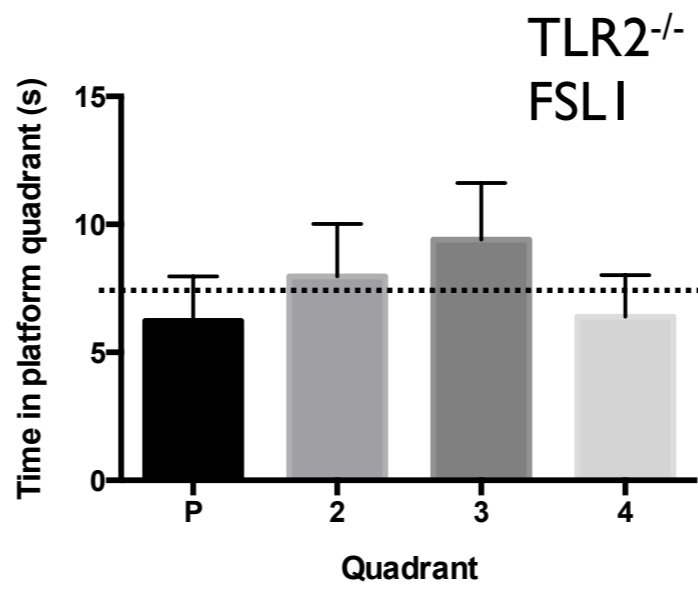

Supplementary figure 2

A

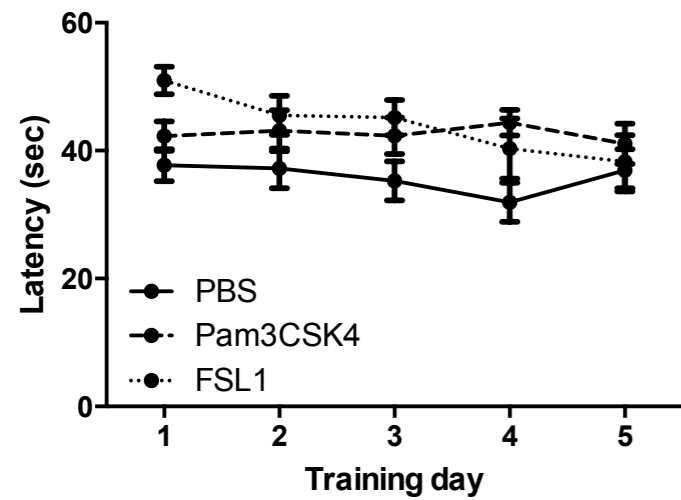

B

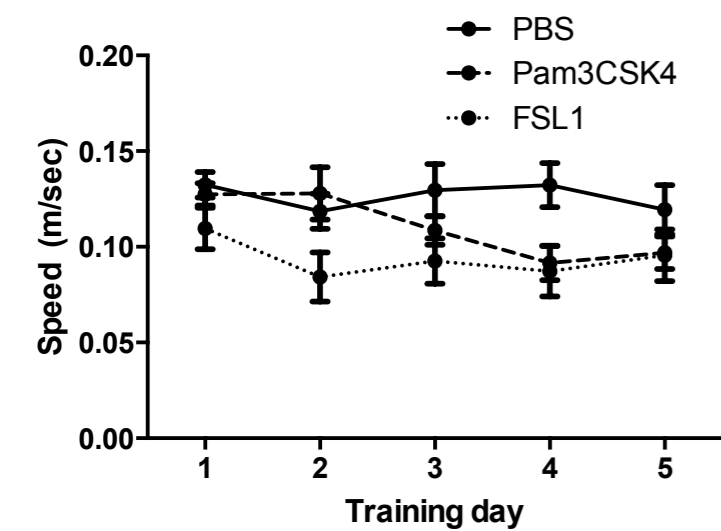

C

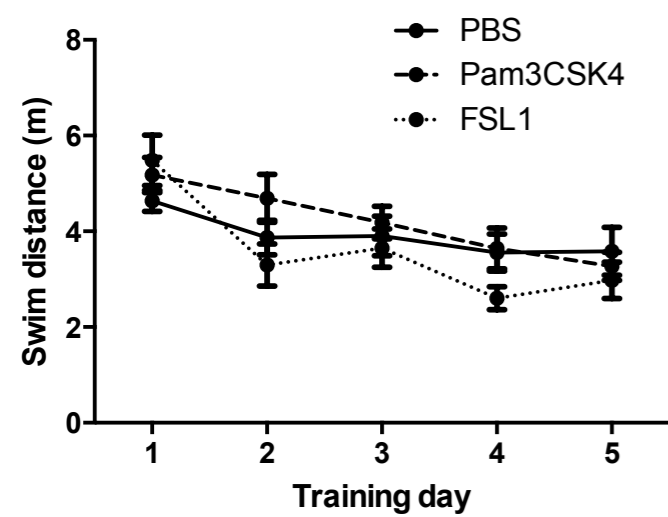

Supplement: NIHMS694322-supplement-2.pdf [file NIHMS694322-supplement-2.pdf]
